# Supplementary material for: Tailoring of structured hydroxypropyl methylcellulose-stabilized emulsions for encapsulation of nobiletin: modification of the oil and aqueous phases
Source: Royal Society of Chemistry journal article supplement (doi:10.1039/c7fo02068f), 2018-01-01

### Supplementary materials

**Fig. 1S** Nobiletin retention concentration in emulsions as a function of time and (B) microstructure of emulsions and nobiletin crystals

**Fig. 2S** Profiles of released FFAs as a function of digestion time from different emulsion systems

**Fig. 1S**

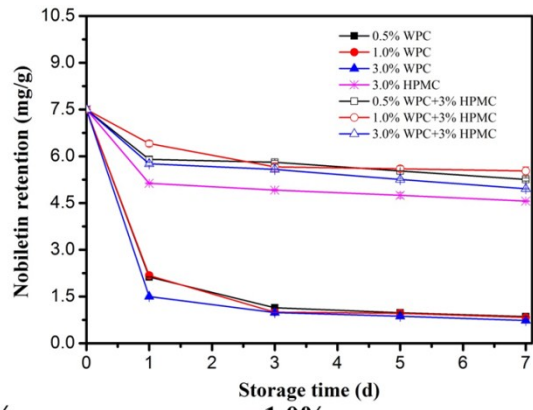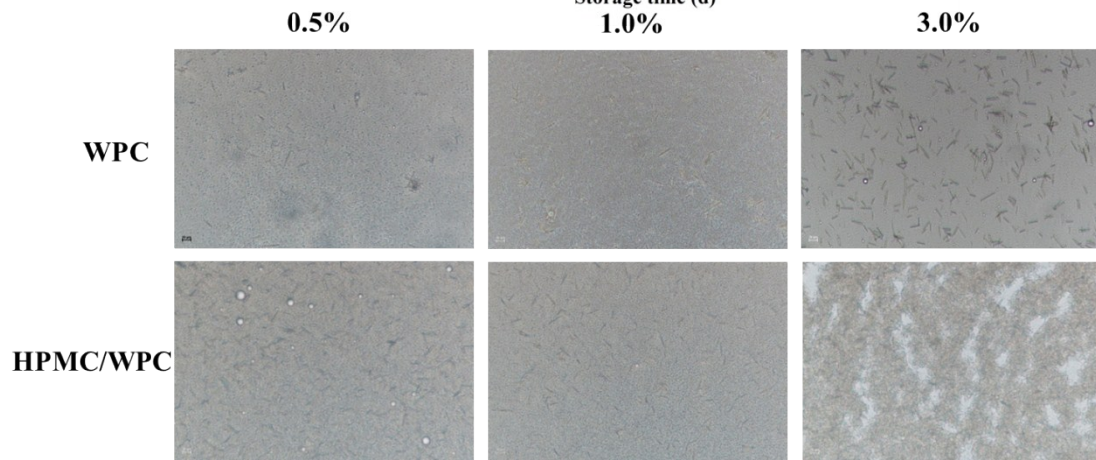

Fig. 2S

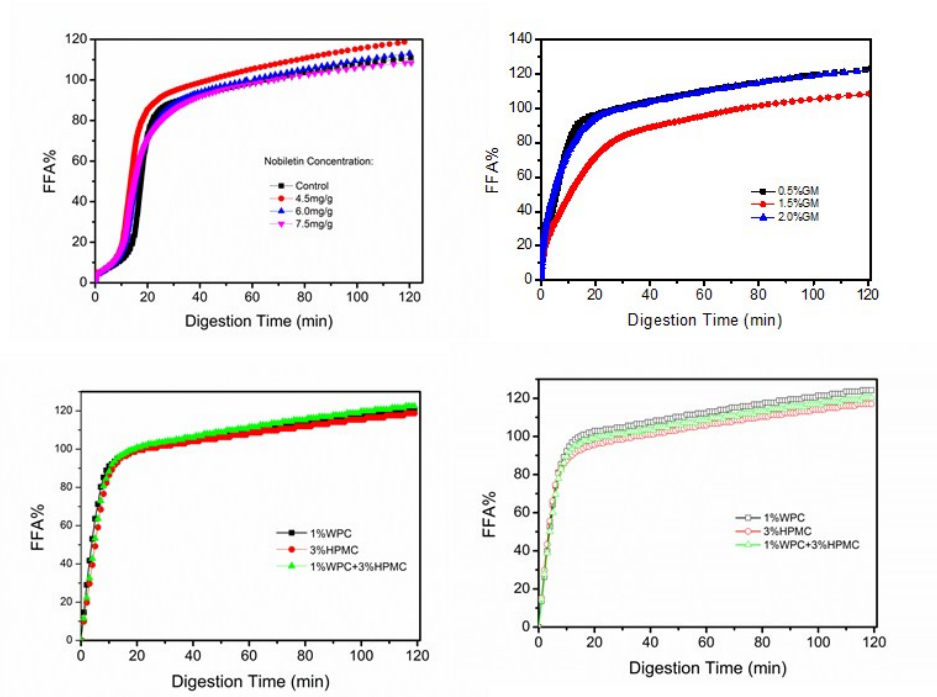

Supplement: c7fo02068f1.pdf [file c7fo02068f1.pdf]
